# Supplementary material for: The Destructive Tree Pathogen Phytophthora ramorum Originates from the Laurosilva Forests of East Asia
Source: MDPI journal article supplement (doi:10.3390/jof7030226), 2021-03-18
Supplement: s1 [file s1]

# Supplementary Tables

**Supplementary Table S1.** Location, altitude and vegetation of the forest stream catchments in northern Vietnam and Japan included in the *Phytophthora ramorum* survey, sampling method, lineages, mating types (A1, A2, A0) and isolate codes.

| Stream catchment no. | GPS coordinates              | Altitude (m a.s.l) | Location; stream/river                                            | Vegetation of catchment                                                                                                                                                      | Sampling method                                         | <i>Phytophthora ramorum</i> lineages/mating types: isolate codes <sup>a</sup>                                                                                                                                                                                |
|----------------------|------------------------------|--------------------|-------------------------------------------------------------------|------------------------------------------------------------------------------------------------------------------------------------------------------------------------------|---------------------------------------------------------|--------------------------------------------------------------------------------------------------------------------------------------------------------------------------------------------------------------------------------------------------------------|
| VN-S1                | N22 20.127<br>E103 46.782    | 2083               | Northern Vietnam, Hoàng Liên NP, Fansipan mountain; forest stream | Subalpine and montane Rhododendron scrub and forests, montane diverse laurosilva forests dominated by <i>Castanopsis</i> spp., <i>Quercus</i> spp. and <i>Neolitsea</i> spp. | Stream baiting<br><br>Fallen leaves/flowers from stream | <b>IC1/A1:</b> VN71, VN75, VN78, VN118, VN120, VN121, VN122, VN123, VN280, VN281, VN283, VN284<br><b>IC1/A1:</b> VN835, VN876, VN900, VN901<br><b>IC1/n.t.:</b> VN833, VN836, VN837, VN856, VN857, VN864, VN880, VN882, VN904, VN914<br><b>IC5/A0:</b> VN863 |
| VN-S2                | N22 20.440<br>E103 46.576    | 2007               | Northern Vietnam, Hoàng Liên NP, Fansipan mountain; forest stream | Subalpine and montane Rhododendron scrub and forests, montane diverse laurosilva forests dominated by <i>Castanopsis</i> spp., <i>Quercus</i> spp. and <i>Neolitsea</i> spp. | Stream baiting<br><br>Fallen leaves/flowers from stream | <b>IC1/A1:</b> VN160<br><b>IC1/A1:</b> VN866, VN877, VN878, VN879, VN881, VN889, VN921, VN924<br><b>IC1/n.t.:</b> VN865, VN909, VN912, VN915, VN918                                                                                                          |
| VN-S3                | N22 21.046<br>E103 46.273    | 1913               | Northern Vietnam, Hoàng Liên NP, Fansipan mountain; forest stream | Montane diverse laurosilva forests dominated by <i>Castanopsis</i> spp., <i>Quercus</i> spp. and <i>Neolitsea</i> spp.                                                       | Stream baiting                                          | <b>IC2/A2:</b> VN142, VN150, VN169, VN314                                                                                                                                                                                                                    |
| VN-S4                | N22 21.029<br>E103 46.317    | 1904               | Northern Vietnam, Hoàng Liên NP, Fansipan mountain; forest stream | Montane diverse laurosilva forests dominated by <i>Castanopsis</i> spp., <i>Quercus</i> spp. and <i>Neolitsea</i> spp.                                                       | Stream baiting                                          | <b>IC1/A1:</b> VN57<br><b>IC3/A2:</b> VN88                                                                                                                                                                                                                   |
| VN-S5                | N22 20.906<br>E103 46.197    | 1895               | Northern Vietnam, Hoàng Liên NP, Fansipan mountain; forest stream | Montane diverse laurosilva forests dominated by <i>Castanopsis</i> spp., <i>Quercus</i> spp. and <i>Neolitsea</i> spp.                                                       | Stream baiting                                          | <b>IC1/A1:</b> VN163, VN166, VN201                                                                                                                                                                                                                           |
| VN-S6                | N 22 20.911,<br>E 103 46.199 | 1896               | Northern Vietnam, Hoàng Liên NP, Fansipan mountain; forest stream | Montane diverse laurosilva forests dominated by <i>Castanopsis</i> spp., <i>Quercus</i> spp. and <i>Neolitsea</i> spp.                                                       | Stream baiting                                          | -                                                                                                                                                                                                                                                            |

| Stream catchment no. | GPS coordinates              | Altitude (m a.s.l) | Location; stream/river                                                           | Vegetation of catchment                                                                                                                                                                                  | Sampling method                                                   | <i>Phytophthora ramorum</i> lineages/mating types: isolate codes <sup>a</sup>                 |
|----------------------|------------------------------|--------------------|----------------------------------------------------------------------------------|----------------------------------------------------------------------------------------------------------------------------------------------------------------------------------------------------------|-------------------------------------------------------------------|-----------------------------------------------------------------------------------------------|
| VN-S7                | N22 20.902<br>E103 46.261    | 1912               | Northern Vietnam, Hoàng Liên NP, Fansipan mountain; forest stream                | Montane diverse laurosilva forests dominated by <i>Castanopsis</i> spp., <i>Quercus</i> spp. and <i>Neolitsea</i> spp.                                                                                   | Stream baiting<br><br>Fallen Rhododendron leaves on forest ground | <b>IC1/A1:</b> VN216, VN217, VN310, VN313, VN407, VN408, VN409<br><b>IC1/A1:</b> VN831, VN832 |
| VN-S8                | N 22 20.904,<br>E 103 46.259 | 1911               | Northern Vietnam, Hoàng Liên NP, Fansipan mountain; forest stream                | Montane diverse laurosilva forests dominated by <i>Castanopsis</i> spp., <i>Quercus</i> spp. and <i>Neolitsea</i> spp.                                                                                   | Stream baiting                                                    | -                                                                                             |
| VN-S9                | N22 18.597<br>E103 52.426    | 1013               | Northern Vietnam, close to Hoàng Liên NP; Muong Hoa River                        | Subalpine and montane Rhododendron scrub and forests, montane diverse laurosilva forests, rice fields                                                                                                    | Stream baiting                                                    | -                                                                                             |
| VN-S10               | N 22 19.372,<br>E 103 49.780 | 1193               | Northern Vietnam, Hoàng Liên NP, Fansipan mountain; Cat Cat River                | Montane diverse laurosilva forests dominated by <i>Castanopsis</i> spp., <i>Quercus</i> spp. and <i>Neolitsea</i> spp.                                                                                   | Stream baiting<br>Fallen leaves from stream                       | -<br><b>IC1/A1:</b> VN852, VN853, VN1015, VN1016                                              |
| VN-S11               | N 22 22.230,<br>E 103 52.615 | 1308               | Northern Vietnam, Sau Chua mountain; forest stream, tributary of Ngòi Duôi River | Montane diverse laurosilva forest with <i>Chamaecyparis hodginsii</i> , <i>Cunninghamia lanceolata</i> plantations                                                                                       | Stream baiting<br><br>Fallen leaves from stream                   | -<br><br><b>IC4/A1:</b> VN851                                                                 |
| JP-S9                | N 32 44.453,<br>E 132 59.967 | 324                | Japan, Shikoku, Tosashimizu area, Sada-yama forest; forest stream                | Laurosilva forest dominated by <i>Castanopsis sieboldii</i> , <i>Quercus acuta</i> and <i>Machilus thunbergii</i>                                                                                        | Stream baiting                                                    | -                                                                                             |
| JP-S10               | N 32 44.434,<br>E 132 59.947 | 319                | Japan, Shikoku, Tosashimizu area, Sada-yama forest; forest stream                | Laurosilva forest dominated by <i>C. sieboldii</i> , <i>Q. acuta</i> and <i>M. thunbergii</i>                                                                                                            | Stream baiting                                                    | -                                                                                             |
| JP-S11               | N 32 44.354,<br>E 132 59.962 | 288                | Japan, Shikoku, Tosashimizu area, Sada-yama forest; forest stream                | Laurosilva forest dominated by <i>C. sieboldii</i> , <i>Q. acuta</i> and <i>M. thunbergii</i>                                                                                                            | Stream baiting                                                    | -                                                                                             |
| JP-S12               | N 32 46.333,<br>E 132 58.174 | 44                 | Japan, Shikoku, Tosashimizu area, Sada-yama forest; forest stream                | Laurosilva forest dominated by <i>C. sieboldii</i> , <i>Q. acuta</i> and <i>M. thunbergii</i>                                                                                                            | Stream baiting                                                    | -                                                                                             |
| JP-S13               | N 33 8.757,<br>E 132 55.400  | 401                | Japan, Shikoku, Shimanto area; forest stream                                     | Laurosilva forests dominated by <i>Quercus salicina</i> , <i>Q. sessilifolia</i> , <i>Abies firma</i> , <i>Chamaecyparis obtusa</i> and <i>Tsuga sieboldii</i> ; <i>Cryptomeria japonica</i> plantations | Stream baiting                                                    | -                                                                                             |

| Stream catchment no. | GPS coordinates              | Altitude (m a.s.l) | Location; stream/river                                                 | Vegetation of catchment                                                                                                                                                                                            | Sampling method                                 | <i>Phytophthora ramorum</i> lineages/mating types: isolate codes <sup>a</sup> |
|----------------------|------------------------------|--------------------|------------------------------------------------------------------------|--------------------------------------------------------------------------------------------------------------------------------------------------------------------------------------------------------------------|-------------------------------------------------|-------------------------------------------------------------------------------|
| JP-S14               | N 33 8.708,<br>E 132 55.102  | 537                | Japan, Shikoku, Shimanto area; forest stream                           | Laurosilva forest dominated by <i>Q. salicina</i> , <i>Q. sessilifolia</i> , <i>A. firma</i> , <i>C. obtusa</i> and <i>T. sieboldii</i>                                                                            | Stream baiting                                  | -                                                                             |
| JP-S15               | N 33 8.810,<br>E 132 55.022  | 523                | Japan, Shikoku, Shimanto area; forest stream                           | Laurosilva forests dominated by <i>Q. salicina</i> , <i>Q. sessilifolia</i> , <i>A. firma</i> , <i>C. obtusa</i> and <i>T. sieboldii</i>                                                                           | Stream baiting<br>Fallen leaves from stream     | -<br><b>NP1/A1:</b> JP236, JP716, JP916; <i>PL</i> , <i>PFL</i>               |
| JP-S16               | N 33 9.644,<br>E 132 56.186  | 264                | Japan, Shikoku, Shimanto area; Okutome River                           | Laurosilva forests dominated by <i>Q. salicina</i> , <i>Q. sessilifolia</i> , <i>A. firma</i> , <i>C. obtusa</i> and <i>T. sieboldii</i> ; <i>Cryptomeria japonica</i> plantations                                 | Stream baiting                                  | -                                                                             |
| JP-S17               | N 32 1.961,<br>E 131 12.569  | 190                | Japan, Kyushu, Aya area; forest stream, tributary of Ayakita River     | Laurosilva forest dominated by <i>Castanopsis cuspidata</i> , <i>Quercus glauca</i> and <i>M. thunbergii</i>                                                                                                       | Stream baiting                                  | -                                                                             |
| JP-S18               | N 32 1.607,<br>E 131 13.199  | 51                 | Japan, Kyushu, Aya area; Ayakita River                                 | Laurosilva forests dominated by <i>C. cuspidata</i> , <i>Q. glauca</i> and <i>M. thunbergii</i> ; <i>Cryptomeria japonica</i> plantations                                                                          | Stream baiting                                  | -                                                                             |
| JP-S19               | N 32 22.339,<br>E 131 8.686  | 609                | Japan, Kyushu, Shiba area; forest stream, tributary of Hitotsuse River | Partially deciduous montane forest dominated by <i>Quercus</i> spp., <i>Carpinus japonica</i> and <i>A. firma</i> ; <i>Cr. japonica</i> plantations                                                                | Stream baiting                                  | -                                                                             |
| JP-S20               | N 32 21.502,<br>E 131 10.252 | 1014               | Japan, Kyushu, Shiba area; Shitayabu River                             | Partially deciduous montane forest dominated by <i>Quercus</i> spp., <i>Carpinus japonica</i> , <i>Fagus crenata</i> , <i>Betula grossa</i> , <i>Aesculus turbida</i> , <i>Pieris japonica</i> and <i>A. firma</i> | Stream baiting                                  | - <i>PFF</i>                                                                  |
| JP-S21               | N 32 22.045,<br>E 131 8.774  | 612                | Japan, Kyushu, Shiba area; forest stream, tributary of Hitotsuse River | Partially deciduous montane forest dominated by <i>Quercus</i> spp., <i>Ca. japonica</i> , <i>F. crenata</i> , <i>B. grossa</i> , <i>A. turbida</i> , <i>P. japonica</i> and <i>A. firma</i>                       | Stream baiting                                  | -                                                                             |
| JP-S22               | N 31 30.966,<br>E 130 47.004 | 546                | Japan, Kyushu, Tarumizu area; forest stream                            | Laurosilva forest dominated by <i>Lithocarpus edulis</i> and <i>Castanopsis sieboldii</i>                                                                                                                          | Stream baiting<br><br>Fallen leaves from stream | <b>NP2/A2:</b> JP387, JP462                                                   |

| Stream catchment no. | GPS coordinates              | Altitude (m a.s.l) | Location; stream/river                                                  | Vegetation of catchment                                                                                                                                    | Sampling method                                              | <i>Phytophthora ramorum</i> lineages/mating types: isolate codes <sup>a</sup> |
|----------------------|------------------------------|--------------------|-------------------------------------------------------------------------|------------------------------------------------------------------------------------------------------------------------------------------------------------|--------------------------------------------------------------|-------------------------------------------------------------------------------|
| JP-S23               | N 31 31.975,<br>E 130 45.829 | 505                | Japan, Kyushu, Tarumizu area; Kushira River                             | Laurosilva forest dominated by <i>C. sieboldii</i> , <i>Zelkova serrata</i> , <i>M. thunbergii</i> and <i>C. obtusa</i>                                    | Stream baiting                                               | -                                                                             |
| JP-S24               | N 31 31.547,<br>E 130 49.537 | 203                | Japan, Kyushu, Tarumizu area; forest stream, tributary of Kushira River | Laurosilva forests dominated by <i>C. sieboldii</i> , <i>Zelkova serrata</i> , <i>M. thunbergii</i> and <i>C. obtusa</i> ; <i>Cr. japonica</i> plantations | Stream baiting                                               | -                                                                             |
| JP-S31               | N 31 49.732,<br>E 130 38.468 | 335                | Japan, Kyushu, Kirishima area; forest stream                            | Laurosilva forest dominated by <i>Quercus</i> spp. and <i>Neolitsea sericea</i> ; also <i>Camelia japonica</i>                                             | Fallen leaves from stream<br>Fallen leaves from forest floor | <b>NP1/A1:</b> JP1202<br><b>NP3/A2:</b> JP975; <i>PL</i>                      |

<sup>a</sup> n.t., not tested; *PL*, *Phytophthora lateralis* isolated from necrotic *Chamaecyparis* foliage collected from the forest floor; *PFL*, *Phytophthora foliorum* isolated from fallen leaf collected from the stream; *PFF*, *P. foliorum* isolated from attached necrotic foliage of *Pieris japonica*. For a complete list of all *Phytophthora* and other oomycete species isolated in the Vietnamese survey see Jung *et al.* (2020). The surveys in Kyushu and Shikoku were part of a larger oomycete survey across Japan and a complete list of all *Phytophthora* and other oomycete species isolated will be presented elsewhere. Details of the 12 isolates from the EU1, EU2, NA1 and NA2 lineage isolates used in this study are given in Franceschini *et al.* (2014).

**Supplementary Table S2.** GenBank accession numbers of seven nuclear and five mitochondrial gene regions generated in this study for 35 isolates from 12 lineages of *Phytophthora ramorum* and one isolate of *P. lateralalis* and whole genome shotgun sequence contig numbers of GenBank assembly accession GCA\_012656075.1 for *P. hibernalis* isolate BL41G.

| Species              | Isolate | Lineage | *GenBank accession numbers |             |              |               |               |                   |             |                 |             |              |            |            |
|----------------------|---------|---------|----------------------------|-------------|--------------|---------------|---------------|-------------------|-------------|-----------------|-------------|--------------|------------|------------|
|                      |         |         | ITS                        | <i>btub</i> | <i>hsp90</i> | <i>Avh120</i> | <i>Avh121</i> | gwEuk.<br>30.30.1 | <i>trp1</i> | <i>cox1</i>     | <i>cox2</i> | <i>nadh1</i> | Prv8       | Prv9       |
| <i>P. ramorum</i>    | VN57    | IC1     | <b>MN861673</b>            | MW323680    | MW323716     | MW323752      | MW323788      | MW323616          | MW323580    | <b>MN861129</b> | MW323823    | MW323859     | MW323894   | MW323931   |
| <i>P. ramorum</i>    | VN160   | IC1     | MW300302                   | MW323684    | MW323720     | MW323756      | MW323792      | MW323620          | MW323584    | MW323654        | MW323827    | MW323863     | MW323896   | MW323935   |
| <i>P. ramorum</i>    | VN283   | IC1     | MW300303                   | MW323686    | MW323722     | MW323758      | MW323794      | MW323622          | MW323586    | MW323655        | MW323829    | MW323865     | MW323898   | MW323937   |
| <i>P. ramorum</i>    | VN313   | IC1     | MW300304                   | MW323687    | MW323723     | MW323759      | MW323795      | MW323623          | MW323587    | MW323656        | MW323830    | MW323866     | MW323899   | MW323938   |
| <i>P. ramorum</i>    | VN831   | IC1     | MW300306                   | MW323689    | MW323725     | MW323761      | MW323797      | MW323625          | MW323589    | MW323658        | MW323832    | MW323868     | MW323901   | MW323940   |
| <i>P. ramorum</i>    | VN833   | IC1     | MW300307                   | MW323690    | MW323726     | MW323762      | MW323798      | MW323626          | MW323590    | MW323659        | MW323833    | MW323869     | MW323902   | MW323941   |
| <i>P. ramorum</i>    | VN852   | IC1     | <b>MN861672</b>            | MW323692    | MW323728     | MW323764      | MW323800      | MW323628          | MW323592    | <b>MN861128</b> | MW323835    | MW323871     | MW323903   | MW323943   |
| <i>P. ramorum</i>    | VN866   | IC1     | MW300310                   | MW323694    | MW323730     | MW323766      | MW323802      | MW323630          | MW323594    | MW323662        | MW323837    | MW323873     | MW323904   | MW323945   |
| <i>P. ramorum</i>    | VN1015  | IC1     | MW300311                   | MW323695    | MW323731     | MW323767      | MW323803      | MW323631          | MW323595    | MW323663        | MW323838    | MW323874     | MW323905   | MW323946   |
| <i>P. ramorum</i>    | VN142   | IC2     | MW300300                   | MW323682    | MW323718     | MW323754      | MW323790      | MW323618          | MW323582    | MW323652        | MW323825    | MW323861     | MW323919   | MW323933   |
| <i>P. ramorum</i>    | VN150   | IC2     | MW300301                   | MW323683    | MW323719     | MW323755      | MW323791      | MW323619          | MW323583    | MW323653        | MW323826    | MW323862     | MW323920   | MW323934   |
| <i>P. ramorum</i>    | VN169   | IC2     | <b>MN861674</b>            | MW323685    | MW323721     | MW323757      | MW323793      | MW323621          | MW323585    | <b>MN861130</b> | MW323828    | MW323864     | MW323897   | MW323936   |
| <i>P. ramorum</i>    | VN314   | IC2     | MW300305                   | MW323688    | MW323724     | MW323760      | MW323796      | MW323624          | MW323588    | MW323657        | MW323831    | MW323867     | MW323900   | MW323939   |
| <i>P. ramorum</i>    | VN88    | IC3     | <b>MN861675</b>            | MW323681    | MW323717     | MW323753      | MW323789      | MW323617          | MW323581    | <b>MN861131</b> | MW323824    | MW323860     | MW323895   | MW323932   |
| <i>P. ramorum</i>    | VN851   | IC4     | MW300308                   | MW323691    | MW323727     | MW323763      | MW323799      | MW323627          | MW323591    | MW323660        | MW323834    | MW323870     | MW323921   | MW323942   |
| <i>P. ramorum</i>    | VN863   | IC5     | MW300309                   | MW323693    | MW323729     | MW323765      | MW323801      | MW323629          | MW323593    | MW323661        | MW323836    | MW323872     | MW323922   | MW323944   |
| <i>P. ramorum</i>    | JP236   | NP1     | MW300293                   | MW323673    | MW323709     | MW323745      | MW323781      | MW323609          | MW323573    | MW323645        | MW323816    | MW323852     | MW323888   | MW323924   |
| <i>P. ramorum</i>    | JP716   | NP1     | MW300296                   | MW323676    | MW323712     | MW323748      | MW323784      | MW323612          | MW323576    | MW323648        | MW323819    | MW323855     | MW323891   | MW323927   |
| <i>P. ramorum</i>    | JP916   | NP1     | MW300297                   | MW323677    | MW323713     | MW323749      | MW323785      | MW323613          | MW323577    | MW323649        | MW323820    | MW323856     | MW323892   | MW323928   |
| <i>P. ramorum</i>    | JP1202  | NP1     | MW300299                   | MW323679    | MW323715     | MW323751      | MW323787      | MW323615          | MW323579    | MW323651        | MW323822    | MW323858     | MW323918   | MW323930   |
| <i>P. ramorum</i>    | JP387   | NP2     | MW300294                   | MW323674    | MW323710     | MW323746      | MW323782      | MW323610          | MW323574    | MW323646        | MW323817    | MW323853     | MW323889   | MW323925   |
| <i>P. ramorum</i>    | JP462   | NP2     | MW300295                   | MW323675    | MW323711     | MW323747      | MW323783      | MW323611          | MW323575    | MW323647        | MW323818    | MW323854     | MW323890   | MW323926   |
| <i>P. ramorum</i>    | JP975   | NP3     | MW300298                   | MW323678    | MW323714     | MW323750      | MW323786      | MW323614          | MW323578    | MW323650        | MW323821    | MW323857     | MW323893   | MW323929   |
| <i>P. ramorum</i>    | P1367   | EU1     | MW300312                   | MW323696    | MW323732     | MW323768      | MW323804      | MW323632          | MW323596    | MW323664        | MW323839    | MW323875     | MW323906   | MW323947   |
| <i>P. ramorum</i>    | P1376   | EU1     | MW300313                   | MW323697    | MW323733     | MW323769      | MW323805      | MW323633          | MW323597    | MW323665        | MW323840    | MW323876     | MW323907   | MW323948   |
| <i>P. ramorum</i>    | P1578   | EU1     | <b>MN861668</b>            | MW323698    | MW323734     | MW323770      |               | MW323634          | MW323598    | <b>MN861124</b> | MW323841    | MW323877     | MW323908   | MW323949   |
| <i>P. ramorum</i>    | P2460   | EU2     | <b>MN861669</b>            | MW323699    | MW323735     | MW323771      | MW323806      | MW323635          | MW323599    | <b>MN861125</b> | MW323842    | MW323878     | MW323909   | MW323950   |
| <i>P. ramorum</i>    | P2461   | EU2     | MW300314                   | MW323700    | MW323736     | MW323772      | MW323807      | MW323636          | MW323600    | MW323666        | MW323843    | MW323879     | MW323910   | MW323951   |
| <i>P. ramorum</i>    | P2462   | EU2     | MW300315                   | MW323701    | MW323737     | MW323773      | MW323808      | MW323637          | MW323601    | MW323667        | MW323844    | MW323880     | MW323911   | MW323952   |
| <i>P. ramorum</i>    | P1403   | NA1     | MW300316                   | MW323702    | MW323738     | MW323774      | MW323809      | MW323638          | MW323602    | MW323668        | MW323845    | MW323881     | MW323912   | MW323953   |
| <i>P. ramorum</i>    | P1421   | NA1     | <b>MN861670</b>            | MW323703    | MW323739     | MW323775      | MW323810      | MW323639          | MW323603    | <b>MN861126</b> | MW323846    | MW323882     | MW323913   | MW323954   |
| <i>P. ramorum</i>    | P1496   | NA1     | MW300317                   | MW323704    | MW323740     | MW323776      | MW323811      | MW323640          | MW323604    | MW323669        | MW323847    | MW323883     | MW323914   | MW323955   |
| <i>P. ramorum</i>    | P2056   | NA2     | <b>MN861671</b>            | MW323705    | MW323741     | MW323777      | MW323812      | MW323641          | MW323605    | <b>MN861127</b> | MW323848    | MW323884     | MW323915   | MW323956   |
| <i>P. ramorum</i>    | P2057   | NA2     | MW300318                   | MW323706    | MW323742     | MW323778      | MW323813      | MW323642          | MW323606    | MW323670        | MW323849    | MW323885     | MW323916   | MW323957   |
| <i>P. ramorum</i>    | P2058   | NA2     | MW300319                   | MW323707    | MW323743     | MW323779      | MW323814      | MW323643          | MW323607    | MW323671        | MW323851    | MW323886     | MW323917   | MW323958   |
| <i>P. hibernalis</i> | BL41G   |         | contig 172                 | contig 227  | contig 121   | contig 345    | contig 49     | contig 10         | contig 33   | contig 44       | contig 44   | contig 139   | contig 139 | contig 139 |

| Species             | Isolate | Lineage | *GenBank accession numbers |             |              |               |               |                   |             |             |             |              |          |          |
|---------------------|---------|---------|----------------------------|-------------|--------------|---------------|---------------|-------------------|-------------|-------------|-------------|--------------|----------|----------|
|                     |         |         | ITS                        | <i>btub</i> | <i>hsp90</i> | <i>Avh120</i> | <i>Avh121</i> | gwEuk.<br>30.30.1 | <i>trp1</i> | <i>cox1</i> | <i>cox2</i> | <i>nadh1</i> | Prv8     | Prv9     |
| <i>P. lateralis</i> | P2451   | UK      | MW300320                   | MW323708    | MW323744     | MW323780      | MW323815      | MW323644          | MW323608    | MW323672    | MW323850    | MW323887     | MW323923 | MW323959 |

Isolate details for the IC1-IC5 and NP1-NP3 lineages are given in Supplementary Table S1. Origin of known lineage isolates: EU1 isolates, *Viburnum* and *Rhododendron* in the UK; EU2 isolates, *Larix* spp. in Northern Ireland, UK; NA1 isolates, *Rhododendron* and *Vaccinium* in California and Oregon, USA; NA2 isolates, unknown host plants in Oregon, Washington and California, USA (for details see Franceschini *et al.* (2014). For details of *P. lateralis* isolate P2451 see Brasier et al. (2012). With isolate P1578 the amplification of *Avh121* failed repeatedly.

**Supplementary Table S3.** Details of primers, annealing temperatures and Mg<sup>2+</sup> concentrations used to amplify the genomic regions investigated in this study.

| Locus                      | Primer names                      | Primer sequences (5'-3')                                      | Primer (μM)                                      | Annealing temperature (°C) | Mg <sup>2+</sup> (mM) | Reference for primer sequences |
|----------------------------|-----------------------------------|---------------------------------------------------------------|--------------------------------------------------|----------------------------|-----------------------|--------------------------------|
| Nuclear gene regions       |                                   |                                                               |                                                  |                            |                       |                                |
| rDNA ITS <sup>a</sup>      | ITS1<br>ITS4                      | TCCGTAGGTGAACCTGCGG<br>TCCTCCGCTTATTGATATGC                   | 0.5                                              | 57                         | 2                     | White et al. (1990)            |
| <i>Avh120</i> <sup>a</sup> | PrRXLR120_-242F<br>PrRXLR120_639R | CTGTGCGAATCTTGCAACC<br>GCGAATCATTCTACGCTTG                    | 0.2                                              | 55                         | 2                     | Goss et al. (2009)             |
| <i>Avh121</i> <sup>a</sup> | PrRXLR121_-244F<br>PrRXLR121_623R | CATGCTGACCCATTTCAGTACC<br>TCAAAGGGCCTTCTGCATAC                | 0.2                                              | 55                         | 2                     | Goss et al. (2009)             |
| <i>btub</i> <sup>b</sup>   | TUBUF2<br>TUBUR1                  | CGGTAACAACCTGGGCCAAGG<br>CCTGGTACTGCTGGTACTCAG                | 0.8                                              | 60                         | 1.5                   | Kroon et al. (2004)            |
| gwEuk.30.30.1 <sup>a</sup> | Pr9C3c_F<br>Pr9C3c_R              | TTCAAGTGGGAGGAGAGGAA<br>GCTCCAGGATGATCTCTCCA                  | 0.2                                              | 55                         | 2                     | Goss et al. (2009)             |
| <i>hsp90</i> <sup>a</sup>  | HSP90F1<br>HSP90R1                | GCTGGACACGGACAAGAACC<br>ACACCCTTGACRAACGACAG                  | 1                                                | 68                         | 2                     | Blair et al. (2008)            |
| <i>trp1</i> <sup>a</sup>   | Trp1F1<br>Trp1R1                  | CCGAACACGCAAAGTGCAAATAACAAGATGGG<br>CGTCACGGCTGAGCGAAAGTCCCCG | 0.2                                              | 60                         | 2                     | Goss et al. (2009)             |
| Mitochondrial gene regions |                                   |                                                               |                                                  |                            |                       |                                |
| <i>cox1</i> <sup>b</sup>   | COXF4N<br>COXR4N                  | GTATTTCTTCTTTATTAGGTGC<br>CGTGAACATAATGTTACATATAC             | 0.8                                              | 60                         | 3.5                   | Kroon et al. (2004)            |
|                            | FM80RC <sup>c</sup><br>FM85       | TTTCAACAAATCATAAAGATATT<br>AACTTGACTAATAATACCAAA              | 0.5                                              | 55                         | 2                     | Martin & Tooley (2003)         |
|                            | <i>cox2</i> + spacer <sup>a</sup> | FM35<br>Phy10b                                                | CAGAACCTTGGAATTAGG<br>GCAAAAGCACTAAAAATTAAATATAA | 0.4                        | 55                    | 2                              |
| <i>nadh1</i> <sup>b</sup>  | NADHF1<br>NADHR1                  | CTGTGGCTTATTTTACTTTAG<br>CAGCAGTATACAAAAACCAAC                | 0.8                                              | 60                         | 3.5                   | Kroon et al. (2004)            |
| Prv8 <sup>b</sup>          | Prv8-F<br>Prv8-R                  | GTTCTCATTAATTCTTGTTGA<br>TTTATATTTGGTGTAGTGATG                | 0.2                                              | 52                         | 4                     | Martin (2008)                  |
| Prv9 <sup>a</sup>          | Prv9-F<br>Prv9-R                  | CTATTAACATTTAAGATAGTCCA<br>GAACAATTTGAAATTTTACCTA             | 0.2                                              | 55                         | 2                     | Martin (2008)                  |

<sup>a</sup> Loci amplified using DreamTaq DNA Polymerase ([EP0701](#), Thermo Fisher Scientific Inc.) supplied with 10X DreamTaq buffer containing 20 mM MgCl<sub>2</sub>.

<sup>b</sup> Loci amplified using *Taq* DNA Polymerase, recombinant ([EP0401](#), Thermo Fisher Scientific Inc.) supplied with 10X *Taq* Buffer containing KCl. <sup>c</sup> Primer FM80RC is the reverse complement of FM80. Primers were synthesized by Bio Basic Canada Inc. (Markham, ON) and Elizabeth Pharmacon spol. s.r.o. (Brno, Czech Republic).

**Supplementary Table S4.** Summary of main traits discriminating the 12 *Phytophthora ramorum* lineages from Indochina (IC), Japan (NP), Europe (EU) and North America (NA).

| Lineage<br>(mating type) | IC1 (A1)              | IC2 (A2)                           | IC3 (A2)         | IC4 (A1)              | IC5 (A0)            | NP1 (A1)               | NP2 (A2)               | NP3 (A2)         | EU1 (A1)              | EU2 (A1)            | NA1 (A2)            | NA2 (A2)           |
|--------------------------|-----------------------|------------------------------------|------------------|-----------------------|---------------------|------------------------|------------------------|------------------|-----------------------|---------------------|---------------------|--------------------|
| IC1 (A1)                 |                       | C-28-M-<br>(NU) <sup>a</sup> -(MI) | C-M-NU-<br>MI    | C-20-NU               | C-28-M-<br>NU-MI    | C-NU-MI                | C-20-28-M-<br>NU-MI    | C-28-M-<br>NU-MI | C-28-NU-<br>MI        | (C)-NU-MI           | C-20-28-M-<br>NU-MI | C-(28)-M-<br>NU-MI |
| IC2 (A2)                 | C-28-M-<br>*(NU)-(MI) |                                    | C-28-NU-<br>MI   | C-20-28-M-<br>NU-(MI) | C-M-NU-<br>MI       | C-28-M-<br>NU-MI       | C-NU-MI                | C-28-NU-<br>MI   | C-(28)-M-<br>NU-MI    | C-28-M-<br>NU-MI    | C-20-NU-<br>MI      | C-28-NU-<br>MI     |
| IC3 (A2)                 | C-M-NU-<br>MI         | C-28-NU-<br>MI                     |                  | C-28-M-<br>NU-MI      | C-28-M-<br>NU-MI    | C-M-NU-<br>MI          | C-28-NU-<br>MI         | C-28-NU-<br>MI   | C-28-M-<br>NU-MI      | C-28-M-<br>NU-MI    | C-28-NU-<br>MI      | C-28-NU-<br>MI     |
| IC4 (A1)                 | C-20-NU               | C-20-28-M-<br>NU-(MI)              | C-28-M-<br>NU-MI |                       | C-20-28-M-<br>NU-MI | C-20-28-<br>NU-MI      | C-28-M-<br>NU-MI       | C-20-M-<br>NU-MI | C-20-28-<br>NU-MI     | C-NU-MI             | C-20-28-M-<br>NU-MI | C-20-M-<br>NU-MI   |
| IC5 (A0)                 | C-28-M-<br>NU-MI      | C-M-NU-<br>MI                      | C-28-M-<br>NU-MI | C-20-28-M-<br>NU-MI   |                     | C-28-M-<br>NU-MI       | C-M-NU-<br>MI          | C-28-M-<br>NU-MI | C-(28)-M-<br>NU-MI    | C-28-M-<br>NU-MI    | C-M-NU-<br>MI       | C-28-M-<br>NU-     |
| NP1 (A1)                 | C-NU-MI               | C-28-M-<br>NU-MI                   | C-M-NU-<br>MI    | C-20-28-<br>NU-MI     | C-28-M-<br>NU-MI    |                        | C-20-28-M-<br>*(NU)-MI | C-28-M-<br>NU-MI | C-28-NU-<br>MI        | C-20-28-<br>NU-MI   | C-28-M-<br>NU-MI    | C-28-M-<br>NU-MI   |
| NP2 (A2)                 | C-20-28-M-<br>NU-MI   | C-NU-MI                            | C-28-NU-<br>MI   | C-20-28-M-<br>NU-MI   | C-M-NU-<br>MI       | C-20-28-M-<br>*(NU)-MI |                        | C-28-NU-         | C-20-(28)-<br>M-NU-MI | C-28-M-<br>NU-MI    | C-20-(28)-<br>NU-   | C-20-28-<br>NU-MI  |
| NP3 (A2)                 | C-28-M-<br>NU-MI      | C-28-NU-<br>MI                     | C-28-NU-<br>MI   | C-20-M-<br>NU-MI      | C-28-M-<br>NU-MI    | C-28-M-<br>NU-MI       | C-28-NU-               |                  | C-28-M-<br>NU-MI      | C-M-NU-<br>MI       | C-28-NU-            | (C)-NU-MI          |
| EU1 (A1)                 | C-28-NU-<br>MI        | C-(28)-M-<br>NU-MI                 | C-28-M-<br>NU-MI | C-20-28-<br>NU-MI     | C-(28)-M-<br>NU-MI  | C-28-NU-<br>MI         | C-20-(28)-<br>M-NU-MI  | C-28-M-<br>NU-MI |                       | C-20-28-<br>NU-MI   | C-(28)-M-<br>NU-MI  | C-28-M-<br>NU-MI   |
| EU2 (A1)                 | (C)-20-NU-<br>MI      | C-28-M-<br>NU-MI                   | C-28-M-<br>NU-MI | C-NU-MI               | C-28-M-<br>NU-MI    | C-20-28-<br>NU-MI      | C-28-M-<br>NU-MI       | C-M-NU-<br>MI    | C-20-28-<br>NU-MI     |                     | C-20-28-M-<br>NU-MI | (C)-M-NU-<br>MI    |
| NA1 (A2)                 | C-20-28-M-<br>NU-MI   | C-20-(28)-<br>NU-MI                | C-28-NU-<br>MI   | C-20-28-M-<br>NU-MI   | C-(28)-M-<br>NU-MI  | C-28-M-<br>NU-MI       | C-20-(28)-<br>NU-      | C-28-NU-         | C-(28)-M-<br>NU-MI    | C-20-28-M-<br>NU-MI |                     | C-28-NU-<br>MI     |
| NA2 (A2)                 | C-(28)-M-<br>NU-MI    | C-28-NU-<br>MI                     | C-28-NU-<br>MI   | C-20-M-<br>NU-MI      | C-28-M-<br>NU-MI    | C-28-M-<br>NU-MI       | C-20-28-<br>NU-MI      | (C)-NU-MI        | C-28-M-<br>NU-MI      | (C)-M-NU-<br>MI     | C-28-NU-<br>MI      |                    |

C, colony morphology on carrot agar (CA) at 20°C; 20, growth rate on CA at 20°C; 28, G × E stress test on 2% V8-juice agar at 28°C; M, mating type; NU, concatenated nuclear gene sequences; MI, concatenated mitochondrial sequences.

<sup>a</sup> Only heterozygous positions different.
